# Supplementary material
Source: PubMed Central journal article supplement (PMC3072611)
Supplement: mmc1.pdf [file mmc1.pdf]

## Supporting Material

# Antimicrobial Protegrin-1 (PG-1) Forms Amyloid-like Fibrils with Rapid Kinetics Suggesting a Functional Link

Hyunbum Jang,<sup>†Δ</sup> Fernando Teran Arce,<sup>‡Δ</sup> Mirela Mustata,<sup>§Δ</sup> Srinivasan Ramachandran,<sup>‡</sup> Ricardo Capone,<sup>‡</sup> Ruth Nussinov,<sup>†&Δ\*</sup> and Ratnesh Lal<sup>‡Δ\*</sup>

<sup>†</sup>*Center for Cancer Research Nanobiology Program, NCI-Frederick, SAIC-Frederick, Inc., Frederick, Maryland 21702, U.S.A.*

<sup>‡</sup>*Department of Bioengineering and Department of Mechanical and Aerospace Engineering, University of California, San Diego, La Jolla, CA 92093, U.S.A.*

<sup>§</sup>*Department of Materials Science and Engineering, Northwestern University, Evanston, IL 60208, U.S.A.*

<sup>&</sup>*Sackler Inst. of Molecular Medicine, Department of Human Genetics and Molecular Medicine, Sackler School of Medicine, Tel Aviv University, Tel Aviv 69978, Israel*

<sup>Δ</sup>Hyunbum Jang, Fernando Teran Arce, and Mirela Mustata contributed equally to this work.

<sup>Δ</sup>Ruth Nussinov and Ratnesh Lal laboratories contributed equally to this work.

\*Correspondence: [ruthnu@helix.nih.gov](mailto:ruthnu@helix.nih.gov) or [rlal@ucsd.edu](mailto:rlal@ucsd.edu)

**Keywords:** amyloid function,  $\beta$ -sheet, cytotoxicity, antibiotic, atomic force microscopy, molecular dynamics simulations

**Running title:** Antimicrobial PG-1 forms fibrils

**A** Antiparallel  $\beta$ -sheet fibril of PG-1

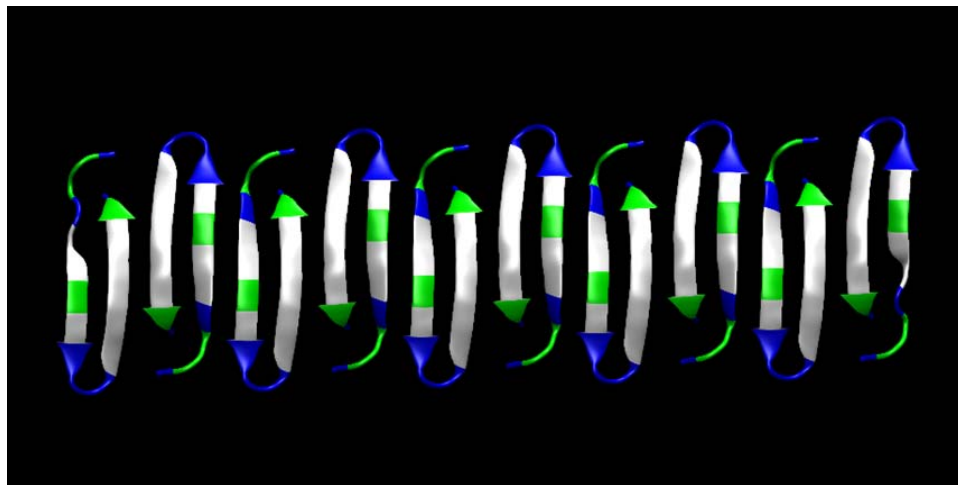

**B** Parallel  $\beta$ -sheet fibril of PG-1

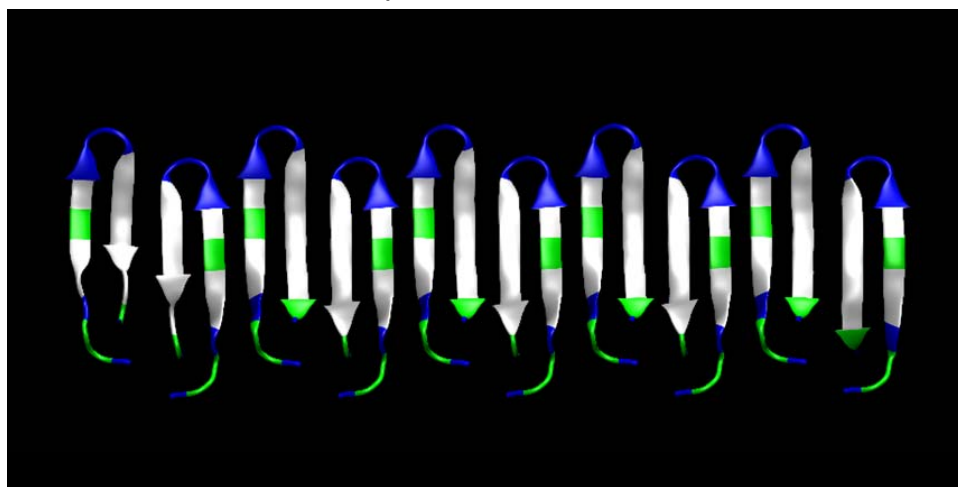

**FIGURE S1** Pre-assembled planar  $\beta$ -sheet fibrils of PG-1. Initially, the PG-1 peptides are assembled to form the (A) antiparallel (turn-next-to-tail) and (B) parallel (turn-next-to-turn)  $\beta$ -sheets in a multimeric NCCN packing.

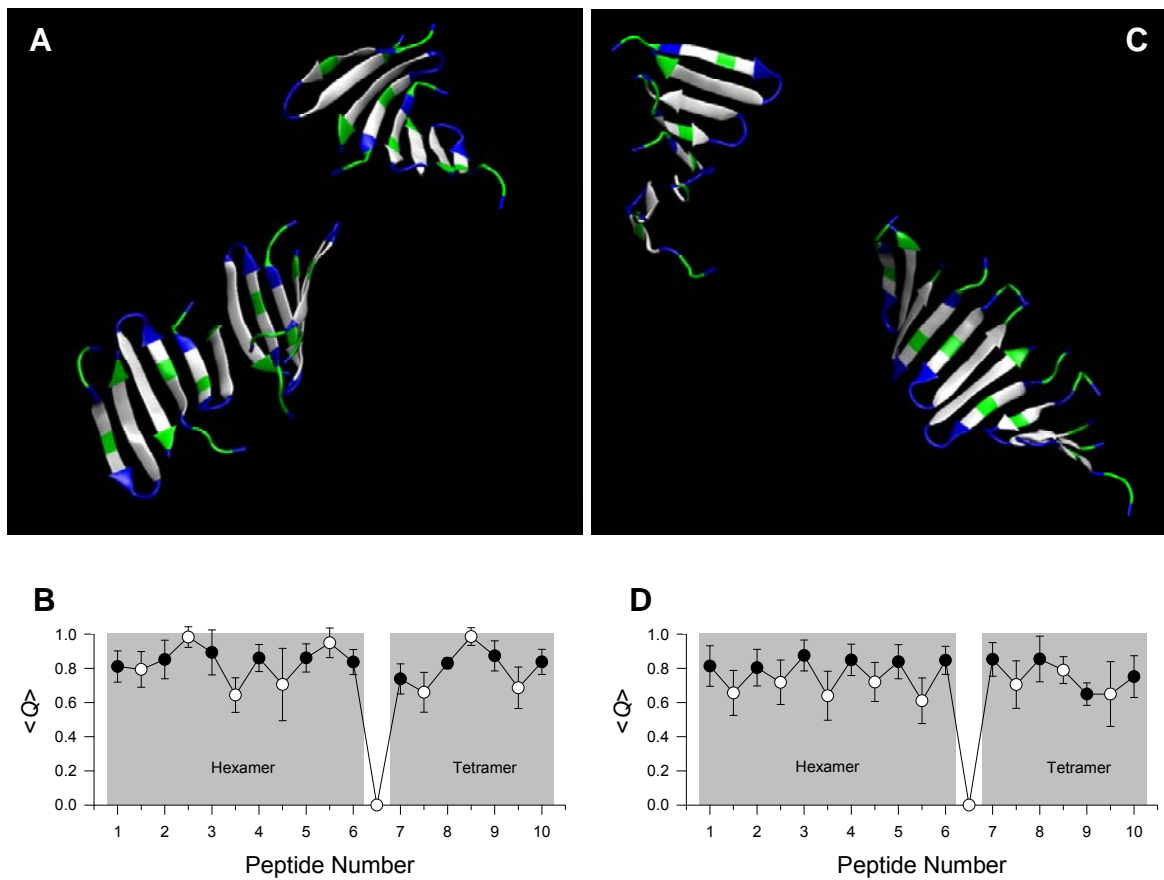

**FIGURE S2** Snapshots of fibril structures in water at the end simulations in a ribbon representation for the (A) antiparallel and (C) parallel  $\beta$ -sheet fibrils of PG-1. In the peptides, hydrophobic residues are shown in white, polar and Gly residues are shown in green, and positively charged residues are shown in blue. Average fractions of intramolecular (solid circles) and intermolecular (open circles) backbone H-bonds,  $Q$ , as a function of peptide number for the (B) antiparallel and (D) parallel  $\beta$ -sheet fibrils of PG-1. Both antiparallel and parallel  $\beta$ -sheet fibrils break into 2 parts; hexamer and tetramer. Crossed  $\beta$ -sheet structures are distinct in the small PG-1  $\beta$ -sheets.
